# Supplementary material for: Screening for non-alcoholic fatty liver disease in type 2 diabetes using non-invasive scores and association with diabetic complications
Source: PubMed Central journal article supplement — BMJ Open Diabetes Res Care. 2020 Feb 3;8(1):e000904. doi: 10.1136/bmjdrc-2019-000904 (PMC7039600; doi:10.1136/bmjdrc-2019-000904), 2020-02-03
Supplement: bmjdrc-2019-000904supp001.pdf [file bmjdrc-2019-000904supp001.pdf]

1 **SUPPLEMENTARY TABLES**

2

3 **Supplementary Table 1.** Definition of liver steatosis and fibrosis biomarkers and relative cutoffs

4

| <b>Liver steatosis</b>             |                                                                                                                                                                                                                                                                                   |                  |
|------------------------------------|-----------------------------------------------------------------------------------------------------------------------------------------------------------------------------------------------------------------------------------------------------------------------------------|------------------|
| <b>Biomarker</b>                   | <b>Algorithm</b>                                                                                                                                                                                                                                                                  | <b>Cut-offs</b>  |
| Fatty Liver Index (FLI)            | $e^y / (1 + e^y) \times 100$<br>Where $y = 0.953 \times \ln(\text{triglycerides, mg/dL}) + 0.139 \times \text{BMI, kg/m}^2 + 0.718 \times \ln(\text{GGT, U/L}) + 0.053 \times \text{waist circumference, cm} - 15.745$                                                            | 30 and 60        |
| Hepatic Steatosis Index (HSI)      | $\text{HSI} = 8 \times \text{ALT/AST} + \text{BMI} (+ 2 \text{ if type 2 diabetes yes, } + 2 \text{ if female})$                                                                                                                                                                  | 30 and 36        |
| NAFLD Ridge Score (NRS)            | $-0.614 + 0.007 \times \text{ALT} - 0.214 \times \text{HDL-C} + 0.053 \times \text{triglyceride} + 0.144 \times \text{HbA1c} + 0.032 \times \text{WBC} + 0.132 \times \text{HT}$                                                                                                  | 0.24 and 0.44    |
| <b>Liver fibrosis</b>              |                                                                                                                                                                                                                                                                                   |                  |
| <b>Biomarker</b>                   | <b>Algorithm</b>                                                                                                                                                                                                                                                                  | <b>Cut-offs</b>  |
| NAFLD Fibrosis Score (NFS)         | $-1.675 + (0.037 \times \text{age [years]}) + (0.094 \times \text{BMI [kg/m}^2]) + (1.13 \times \text{IFG/diabetes [yes = 1, no = 0]}) + (0.99 \times \text{AST/ALT ratio}) - (0.013 \times \text{platelet count [} \times 10^9/\text{L]}) - (0.66 \times \text{albumin [g/dl]})$ | -1.455 and 0.675 |
| Fibrosis-4 (FIB-4)                 | $(\text{age (years)} \times \text{AST (IU/L)}) / (\text{platelet count (} 10^9/\text{L)} \times \text{ALT (IU/L)})$                                                                                                                                                               | 1.3 and 2.67     |
| AST/ALT                            | $\text{AST (IU/L)} / \text{ALT (IU/L)}$                                                                                                                                                                                                                                           | 0.8 and 1.4      |
| AST to platelet ratio index (APRI) | $(\text{AST (IU/L)} / \text{AST (ULN)}) / \text{platelet count (} 10^9/\text{L)} \times 100$                                                                                                                                                                                      | 0.5 and 1.5      |

5

6 Abbreviations: ALT, alanine aminotransferase; AST, aspartate aminotransferase; BMI, body mass index; GGT, gamma glutamyltransferase;

7 ULN, upper limit of normal; WBC, white blood cells; HT, hypertension

8

9 **Supplementary Table 2.** Anthropometric and biochemical features of the study subjects

10

| <i>Variables</i>                           | <i>ENTIRE<br/>POPULATION</i> | <i>FLI</i>     | <i>HIS</i>      | <i>NAFLD RIDGE<br/>SCORE</i> | <i>AST / ALT</i> | <i>APRI</i>    | <i>FIB-4</i>   | <i>NAFLD FIBROSIS<br/>SCORE</i> |
|--------------------------------------------|------------------------------|----------------|-----------------|------------------------------|------------------|----------------|----------------|---------------------------------|
| Number (Male/Female)                       | 2770 (1637/1133)             | 1519 (930/653) | 2076 (1218/860) | 1082 (663/449)               | 2096 (1223/873)  | 1429 (843/586) | 1421 (837/584) | 370 (229/141)                   |
| Age (yrs)                                  | 68 ± 12                      | 67 ± 11        | 68 ± 12         | 68 ± 12                      | 68 ± 12          | 68 ± 12        | 68 ± 12        | 69 ± 11                         |
| BMI (kg/m <sup>2</sup> )                   | 30.23 ± 5.93                 | 30.56 ± 6      | 30.32 ± 5.91    | 30.78 ± 6.06                 | 30.32 ± 5.91     | 30.48 ± 6      | 30.47 ± 6.01   | 31.14 ± 6.6                     |
| Waist circumference (cm)                   | 106 ± 14                     | 106 ± 14       | 106 ± 14        | 107 ± 14                     | 106 ± 14         | 106 ± 14       | 106 ± 14       | 108 ± 15                        |
| Systolic Blood Pressure (mmHg)             | 140 ± 42                     | 140 ± 33       | 140 ± 39        | 140 ± 37                     | 140 ± 39         | 139 ± 34       | 139 ± 34       | 141 ± 22                        |
| Diastolic Blood Pressure (mmHg)            | 78 ± 12                      | 78 ± 12        | 78 ± 12         | 77 ± 12                      | 78 ± 12          | 78 ± 12        | 78 ± 12        | 77 ± 13                         |
| Heart Rate (bpm)                           | 78 ± 13                      | 78 ± 13        | 78 ± 13         | 78 ± 13                      | 78 ± 13          | 78 ± 14        | 78 ± 14        | 78 ± 13                         |
| T2DM duration (yrs)                        | 10 ± 9                       | 10 ± 9         | 9 ± 9           | 10 ± 9                       | 9 ± 9            | 9 ± 9          | 10 ± 9         | 10 ± 9                          |
| Fasting plasma glucose (mg/dL)             | 150 ± 68                     | 149 ± 72       | 149 ± 69        | 147 ± 61                     | 149 ± 69         | 149 ± 63       | 149 ± 63       | 144 ± 48                        |
| HbA1c (%)                                  | 7.4 ± 3.9                    | 7.2 ± 1.3      | 7.3 ± 1.4       | 7.2 ± 1.3                    | 7.3 ± 1.4        | 7.3 ± 1.3      | 7.3 ± 1.3      | 7.1 ± 1.3                       |
| Creatinine (mg/dL)                         | 1.05 ± 0.68                  | 1.03 ± 0.65    | 1.03 ± 0.62     | 1.04 ± 0.63                  | 1.03 ± 0.63      | 1.05 ± 0.67    | 1.05 ± 0.67    | 1.12 ± 0.84                     |
| eGFR EPI-CKD (mL/min/1.73 m <sup>2</sup> ) | 74.24 ± 24.33                | 75.76 ± 23.84  | 75.47 ± 23.87   | 74.86 ± 24.14                | 75.32 ± 23.95    | 74.84 ± 24.33  | 74.79 ± 24.33  | 72.66 ± 25.23                   |
| Uric acid (mg/dL)                          | 5.6 ± 1.7                    | 5.6 ± 1.7      | 5.6 ± 1.7       | 5.6 ± 1.6                    | 5.6 ± 1.7        | 5.6 ± 1.6      | 5.6 ± 1.6      | 5.5 ± 1.6                       |
| Total cholesterol (mg/dL)                  | 173 ± 46                     | 172 ± 41       | 172 ± 40        | 169 ± 39                     | 172 ± 40         | 170 ± 41       | 170 ± 40       | 168 ± 42                        |
| HDL cholesterol (mg/dL)                    | 48 ± 14                      | 48 ± 14        | 48 ± 14         | 48 ± 15                      | 48 ± 14          | 48 ± 15        | 48 ± 14        | 48 ± 16                         |
| Triglycerides (mg/dL)                      | 143 ± 88                     | 144 ± 86       | 142 ± 83        | 143 ± 88                     | 142 ± 83         | 143 ± 85       | 143 ± 85       | 146 ± 94                        |
| LDL cholesterol (mg/dL)                    | 97 ± 40                      | 96 ± 34        | 96 ± 34         | 94 ± 34                      | 96 ± 34          | 94 ± 34        | 95 ± 34        | 92 ± 37                         |
| AST (U/L)                                  | 23 ± 17                      | 22 ± 14        | 22 ± 16         | 21 ± 11                      | 22 ± 16          | 22 ± 13        | 22 ± 13        | 22 ± 13                         |
| ALT (U/L)                                  | 27 ± 25                      | 26 ± 20        | 26 ± 24         | 24 ± 15                      | 26 ± 24          | 26 ± 20        | 26 ± 20        | 25 ± 21                         |
| GGT (U/L)                                  | 51 ± 80                      | 47 ± 70        | 49 ± 78         | 45 ± 63                      | 49 ± 78          | 50 ± 73        | 50 ± 73        | 55 ± 86                         |
| Platelet count (10 <sup>9</sup> /L)        | 238 ± 75                     | 240 ± 76       | 238 ± 75        | 240 ± 74                     | 239 ± 75         | 239 ± 75       | 239 ± 75       | 239 ± 77                        |
| TSH (mU/L)                                 | 2.44 ± 3.91                  | 2.27 ± 1.94    | 2.24 ± 1.9      | 2.27 ± 1.84                  | 2.24 ± 1.89      | 2.26 ± 1.87    | 2.26 ± 1.87    | 2.27 ± 2.01                     |
| Current smokers (%)                        | 16.5%                        | 17.4%          | 16.8%           | 16.1%                        | 16.8%            | 15.9%          | 15.8%          | 15.5%                           |

|                                          |               |               |               |               |               |               |               |               |
|------------------------------------------|---------------|---------------|---------------|---------------|---------------|---------------|---------------|---------------|
| Metabolic syndrome (%)                   | 90.6%         | 89.6%         | 90.1%         | 90.5%         | 90.1%         | 90.8%         | 90.9%         | 91.6%         |
| Microalbuminuria (%)                     | 29.3%         | 30.4%         | 29.3%         | 28.9%         | 29.5%         | 30.0%         | 29.9%         | 32.8%         |
| Diabetic retinopathy (%)                 | 17.8%         | 17.9%         | 16.7%         | 17.7%         | 16.7%         | 16.8%         | 16.9%         | 20.5%         |
| Cardiovascular event (%)                 | 40.4%         | 40.7%         | 39.8%         | 44.6%         | 40.0%         | 42.9%         | 42.9%         | 53.8%         |
| eGFR EPI-CKD ≤ 90                        | 69.6%         | 67.0%         | 68.0%         | 67.5%         | 68.2%         | 68.7%         | 68.7%         | 71.0%         |
| eGFR EPI-CKD ≤ 60                        | 27.1%         | 25.1%         | 25.5%         | 27.1%         | 25.7%         | 26.5%         | 26.5%         | 29.3%         |
| eGFR EPI-CKD ≤ 30                        | 5.5%          | 4.5%          | 4.4%          | 4.8%          | 4.6%          | 5.1%          | 5.1%          | 6.1%          |
| Oral antidiabetic therapy (%)            | 74.5%         | 76.8%         | 75.6%         | 77.1%         | 75.5%         | 75.3%         | 75.3%         | 73.8%         |
| Therapy with insulin (%)                 | 26.2%         | 27.6%         | 26.2%         | 29.2%         | 26.2%         | 27.7%         | 27.8%         | 32.2%         |
| Therapy with statins (%)                 | 57.5%         | 62.5%         | 60.1%         | 65.6%         | 60.1%         | 62.7%         | 62.8%         | 62.7%         |
| Antihypertensive therapy (%)             | 75.5%         | 75.8%         | 75.3%         | 77.5%         | 75.5%         | 76.9%         | 76.9%         | 79.7%         |
| ACE inhibitor therapy (%)                | 38.6%         | 39.4%         | 39.1%         | 40.4%         | 39.1%         | 40.2%         | 40.3%         | 38.1%         |
| Angiotensin receptor blocker therapy (%) | 22.8%         | 23.6%         | 23.1%         | 23.9%         | 23.1%         | 23.7%         | 23.7%         | 26.5%         |
| Calcium channel blockers (%)             | 25.0%         | 25.4%         | 24.5%         | 26.2%         | 24.5%         | 26.0%         | 26.1%         | 28.9%         |
| Diuretics (%)                            | 39.9%         | 40.2%         | 39.2%         | 41.7%         | 39.4%         | 41.2%         | 41.2%         | 45.1%         |
| β-Blockers therapy (%)                   | 35.6%         | 35.9%         | 34.7%         | 37.5%         | 34.7%         | 37.4%         | 37.3%         | 40.5%         |
| 10 years CHD risk (%)                    | 26.26 ± 16.70 | 26.03 ± 16.81 | 25.89 ± 16.56 | 25.96 ± 16.73 | 25.95 ± 16.62 | 26.4 ± 17.14  | 26.44 ± 17.14 | 27.51 ± 17.75 |
| 10 years fatal CHD risk (%)              | 20.45 ± 15.71 | 20.26 ± 15.83 | 20.07 ± 15.55 | 20.13 ± 15.74 | 20.13 ± 15.62 | 20.55 ± 16.12 | 20.58 ± 16.12 | 21.45 ± 16.5  |
| 10 years stroke risk (%)                 | 22.31 ± 21.67 | 22.11 ± 21.83 | 21.85 ± 21.54 | 22.19 ± 21.99 | 21.9 ± 21.59  | 22.55 ± 22.08 | 22.59 ± 22.1  | 23.58 ± 21.97 |
| 10 years fatal stroke risk (%)           | 3.60 ± 4.87   | 3.65 ± 5.4    | 3.56 ± 5.04   | 3.57 ± 4.88   | 3.56 ± 5.04   | 3.66 ± 5.48   | 3.67 ± 5.48   | 3.66 ± 3.69   |

11

12 Values are presented as the mean ± standard deviation or percentage.

13 Abbreviations: HbA1c, hemoglobin A1C; ALT, alanine aminotransferase; AST, aspartate aminotransferase; BMI, body mass index; GGT, gamma  
14 glutamyltransferase; TSH, Thyroid-stimulating hormone

15
